# Supplementary material
Source: publisher site journal article supplement (https://www.dovepress.com/article/258415)
Supplement: Supplementary file 1 [file get_supplementary_file.php]

Supplemental Figure 1

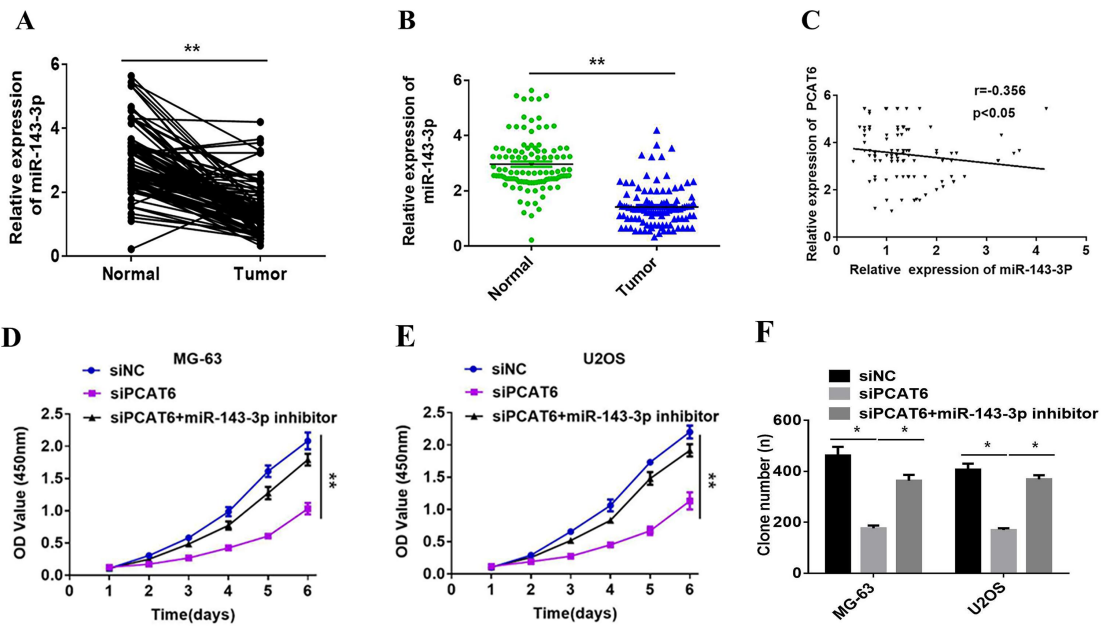

**Supplement Figure 1.** A and B, RT-qPCR analysis for the expression of miR-143-3p in 106 OS specimens.  $**P < 0.01$ . C, Scatter plots showing the negative linear correlation between the mRNA expression of *PCAT6* and miR-143-3p in OS tissues.  $*P < 0.05$ . D-F, CCK-8 and clone formation assays were performed to determine the proliferation capacity of MG-63 and U2OS cells transfected with shPCAT6 in the presence or absence of the miR-143-3p inhibitor.  $*P < 0.05$ ,  $**P < 0.01$ .
